# Supplementary material
Source: PubMed Central journal article supplement (PMC5640267)

Appendix Figure 1

All-cause mortality by single year of age, US white non-Hispanics and comparison countries

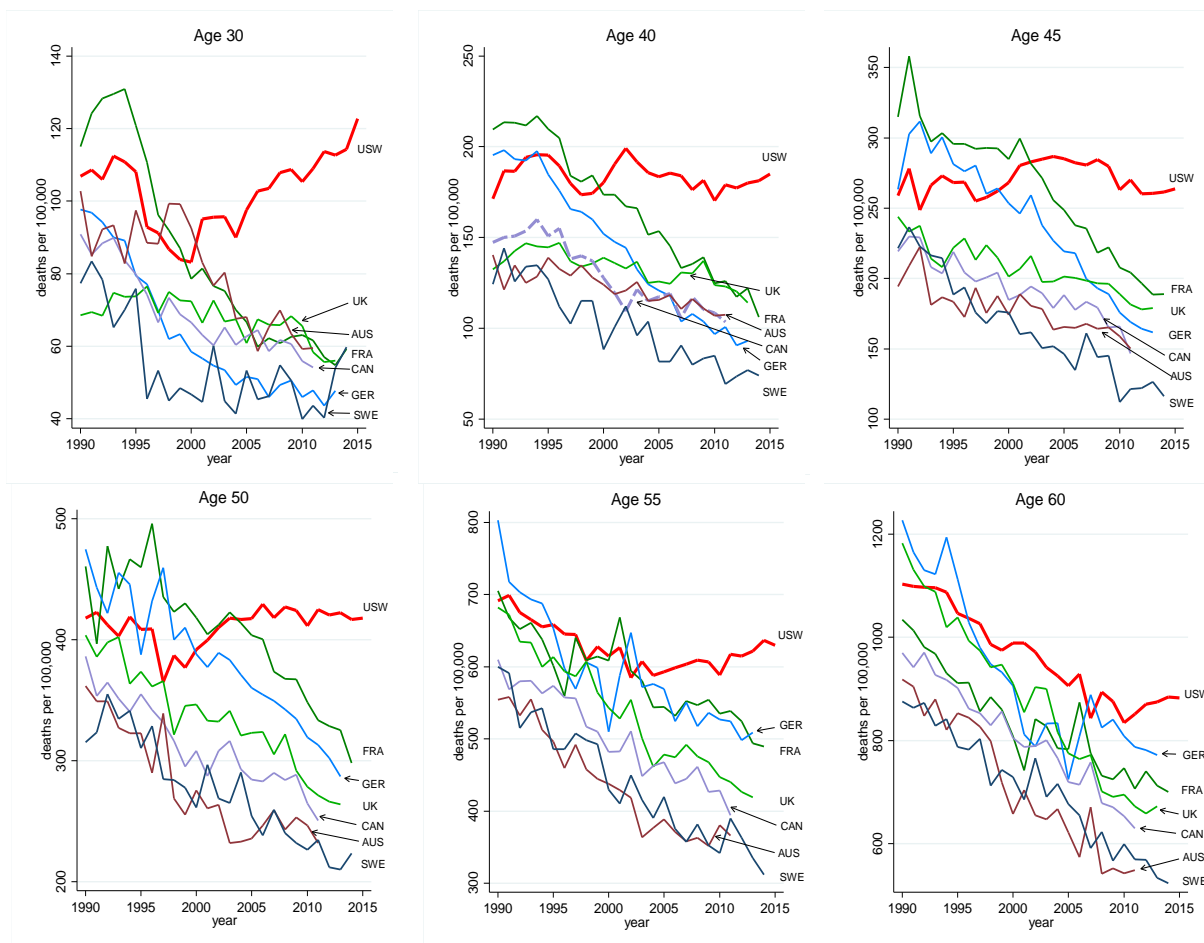

Appendix Figure 2 Drug, alcohol and suicide mortality  
white non-Hispanics 50-54

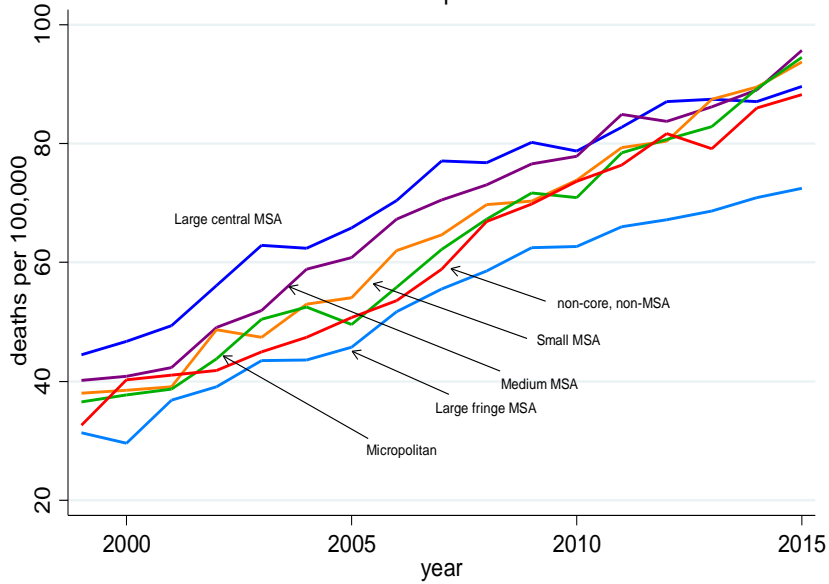

Appendix Figure 3

Drug, alcohol and suicide mortality  
white non-Hispanics by birth cohort, all education levels

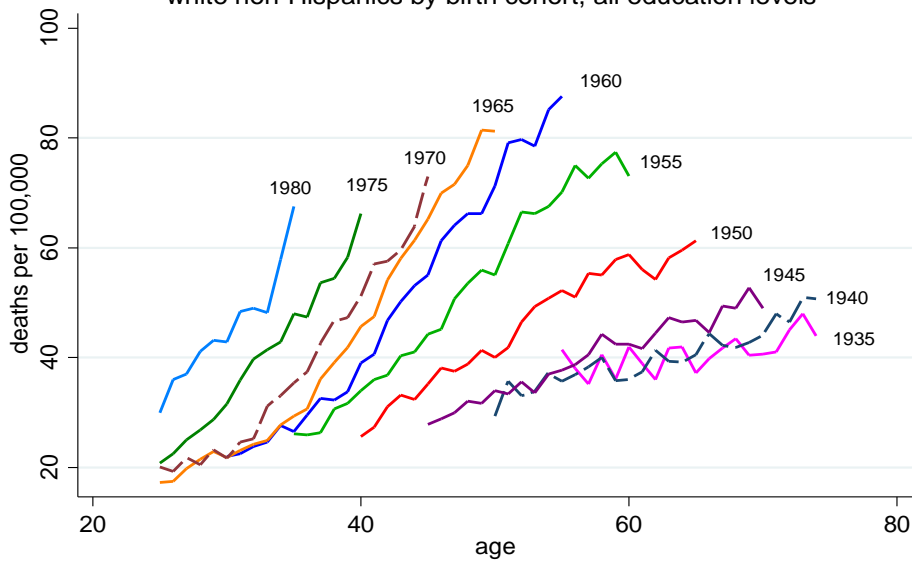

Appendix Figure 4

Lung cancer mortality rates, white non-Hispanic men and women

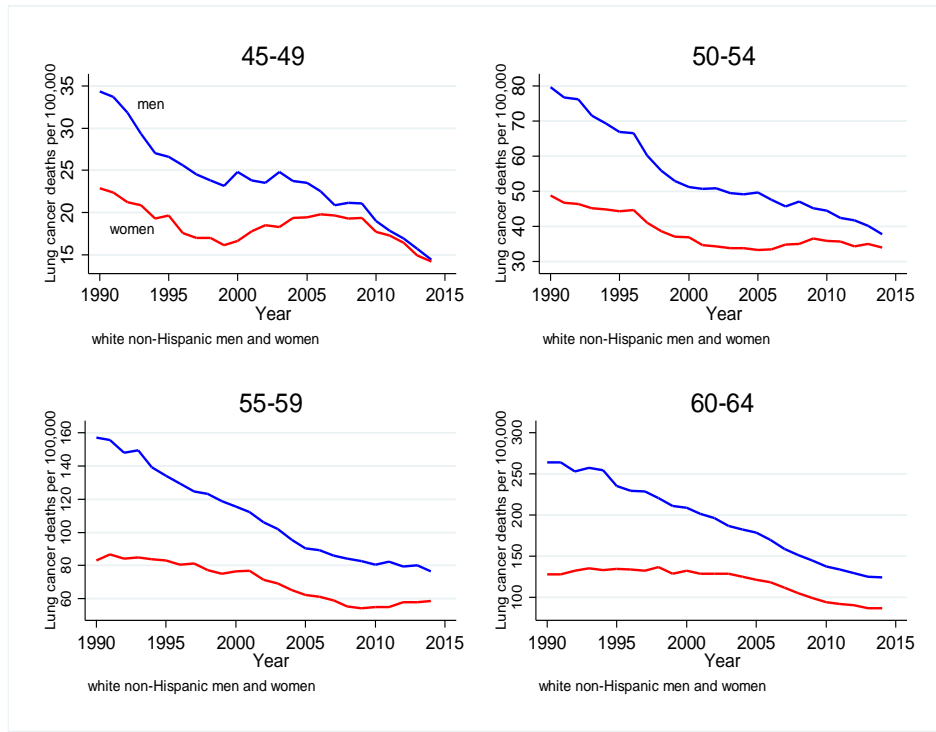

Appendix Figure 5

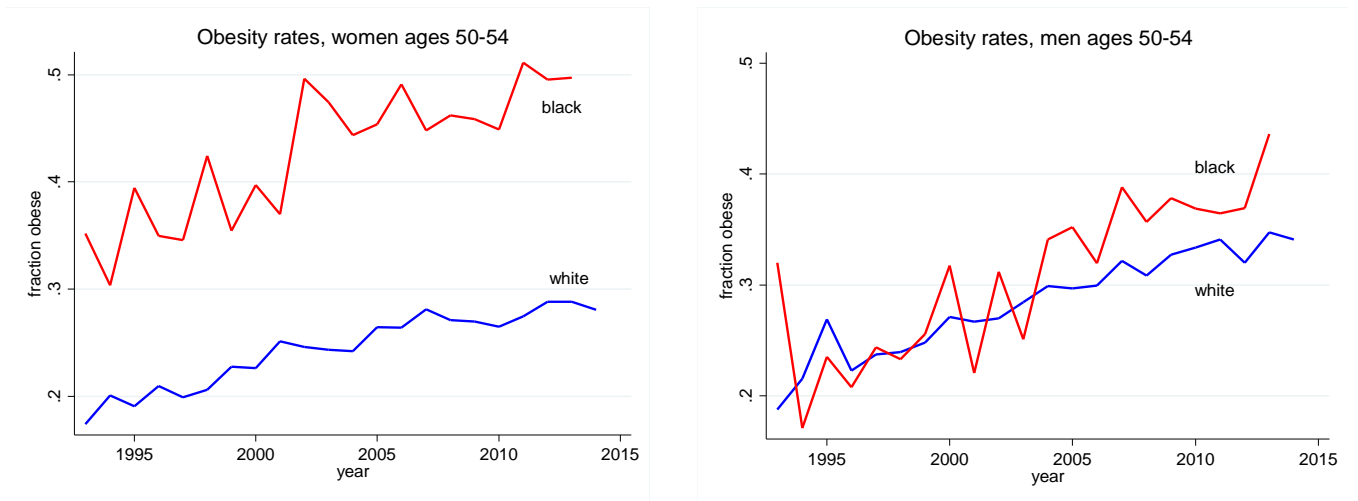

Appendix Figure 6

Rate of change in mortality by education, 1999-2015  
white non-Hispanics ages 50-54

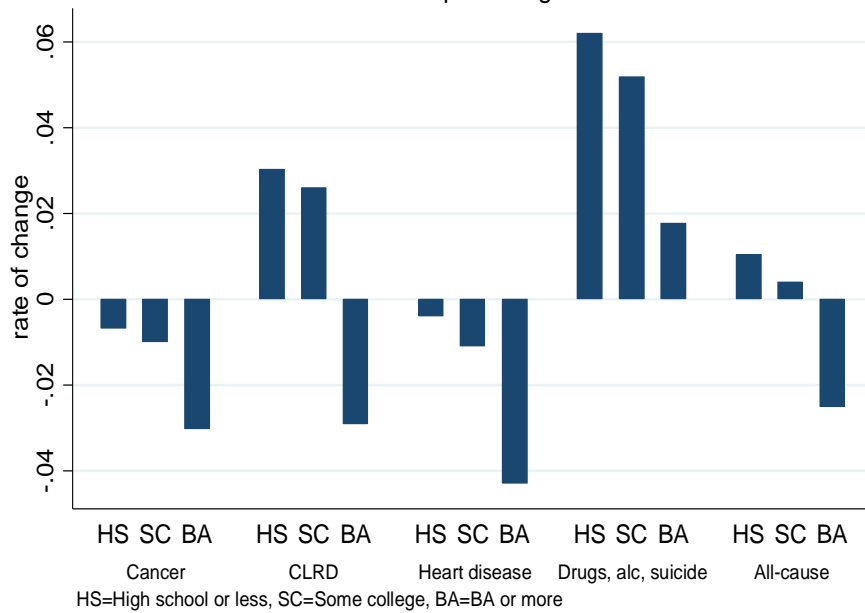

Appendix Figure 7 White non-Hispanic mortality ages 50-54 by cause of death and education class

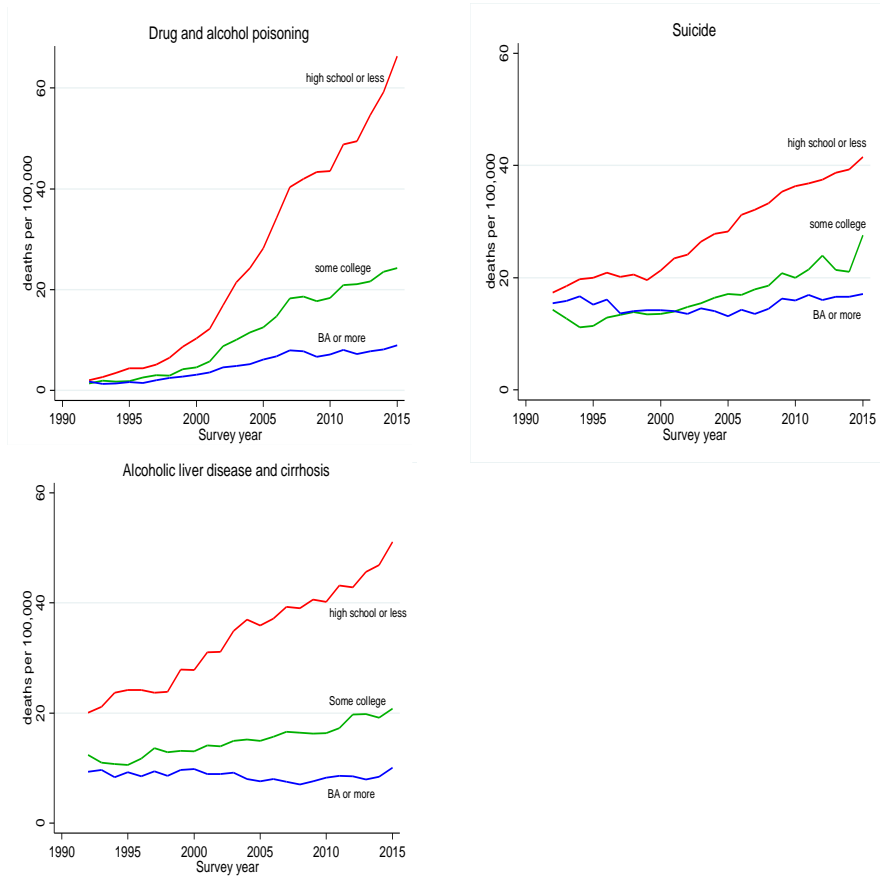

Appendix Figure 8

Median household income per member and all-cause mortality, white non-Hispanics by age group

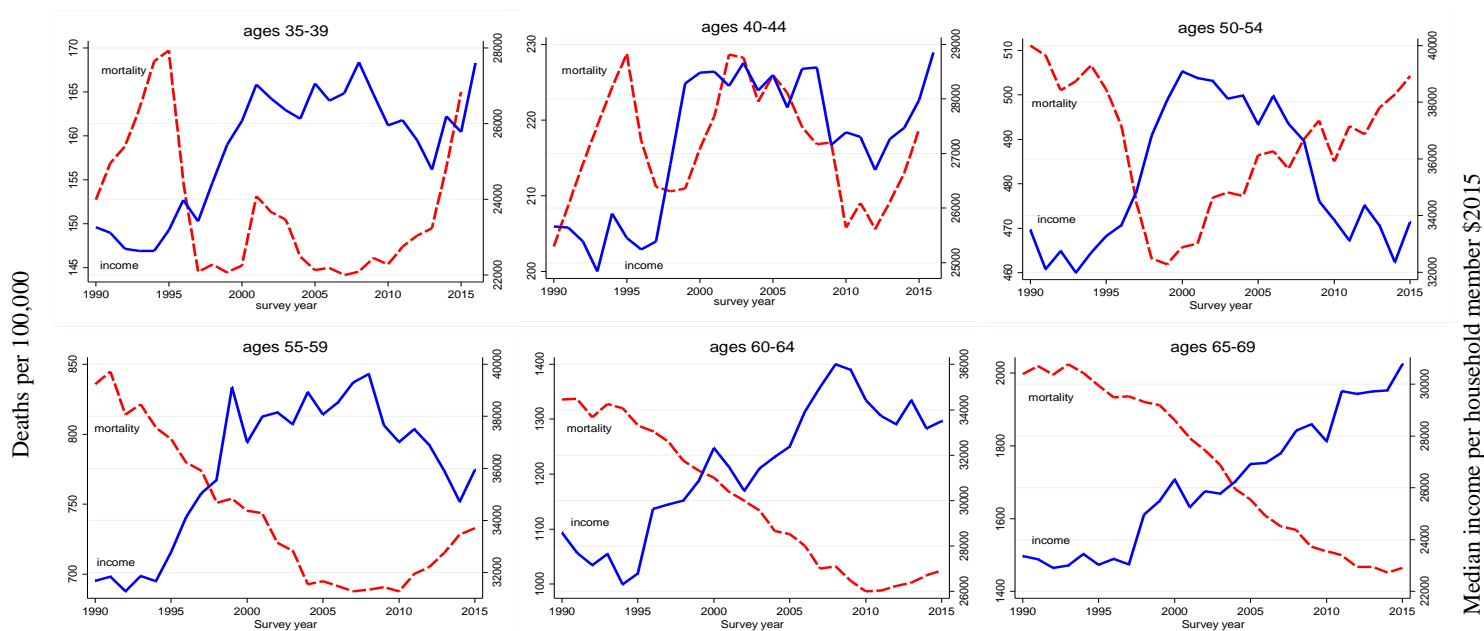

Appendix Figure 9

Percent not in the labor force, white non-Hispanic men, all education groups

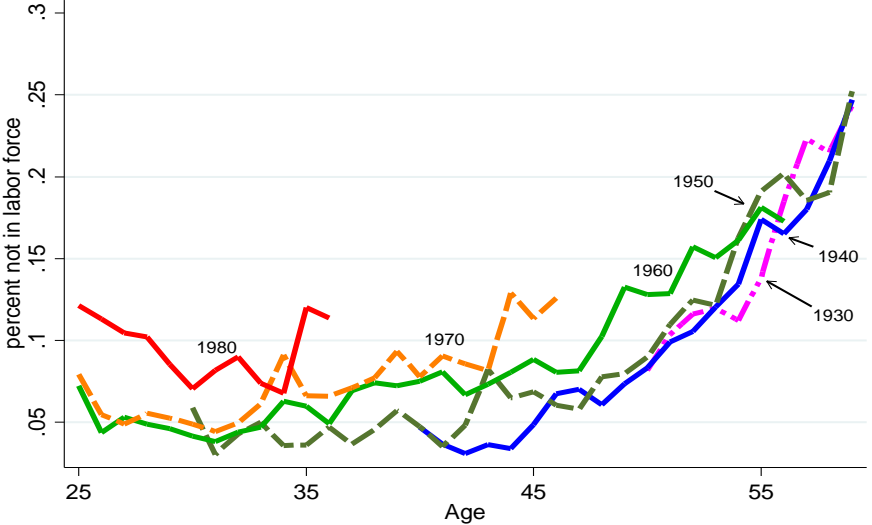

Appendix Figure 10 Mortality morbidity and labor market birth year effects  
white non-Hispanics, BA or more

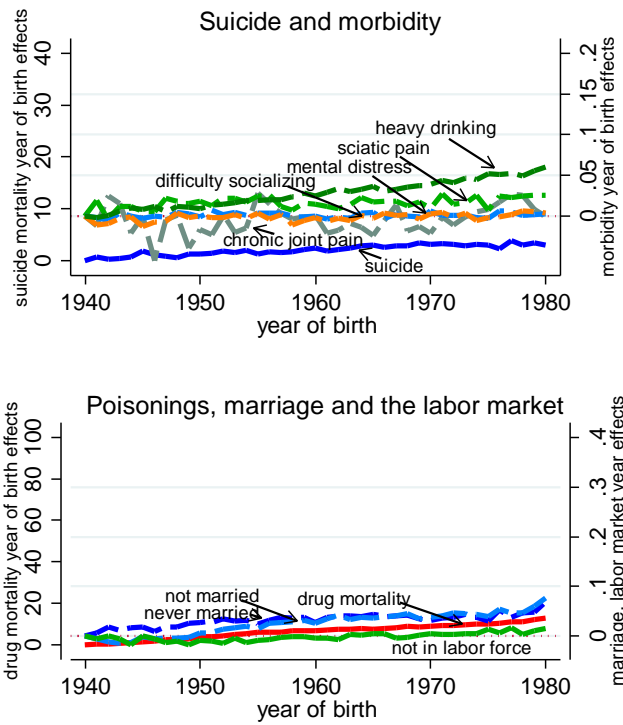

Supplement: NIHMS878957-supplement-Appendix.pdf [file NIHMS878957-supplement-Appendix.pdf]
